# Supplementary material for: Aggressive angiomyxoma: The first case report in skull
Source: PubMed Central journal article supplement (PMC9428339; doi:10.3389/fsurg.2022.985739), 2022-08-17

Supplementary image

After the first operation

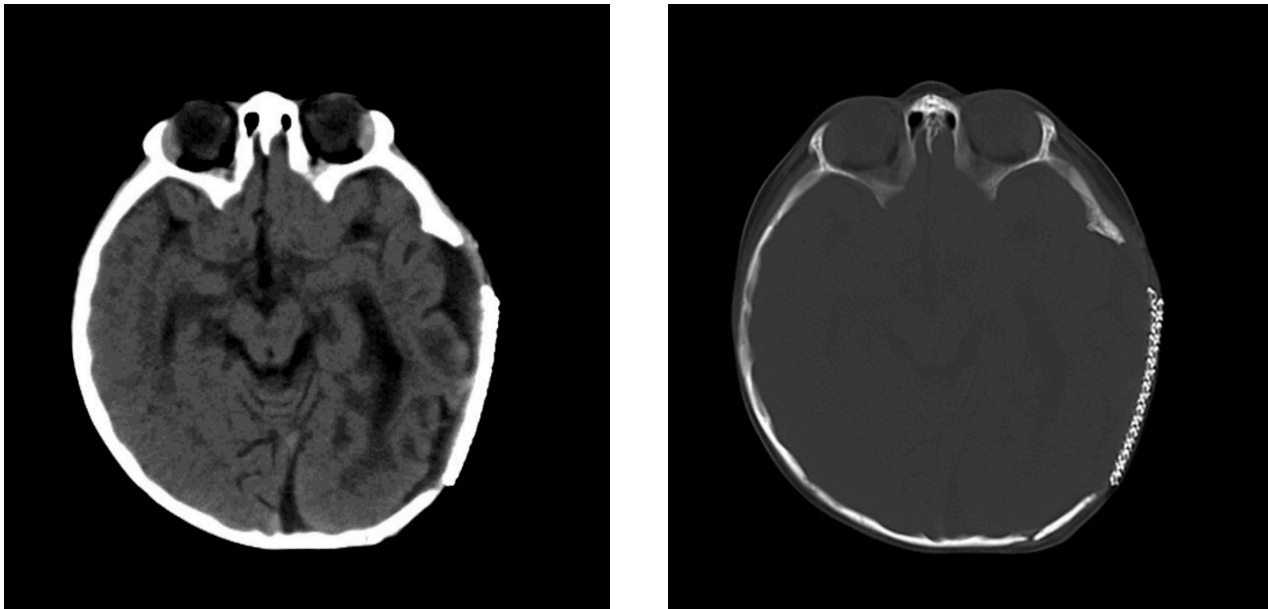

7 days, after the first operation

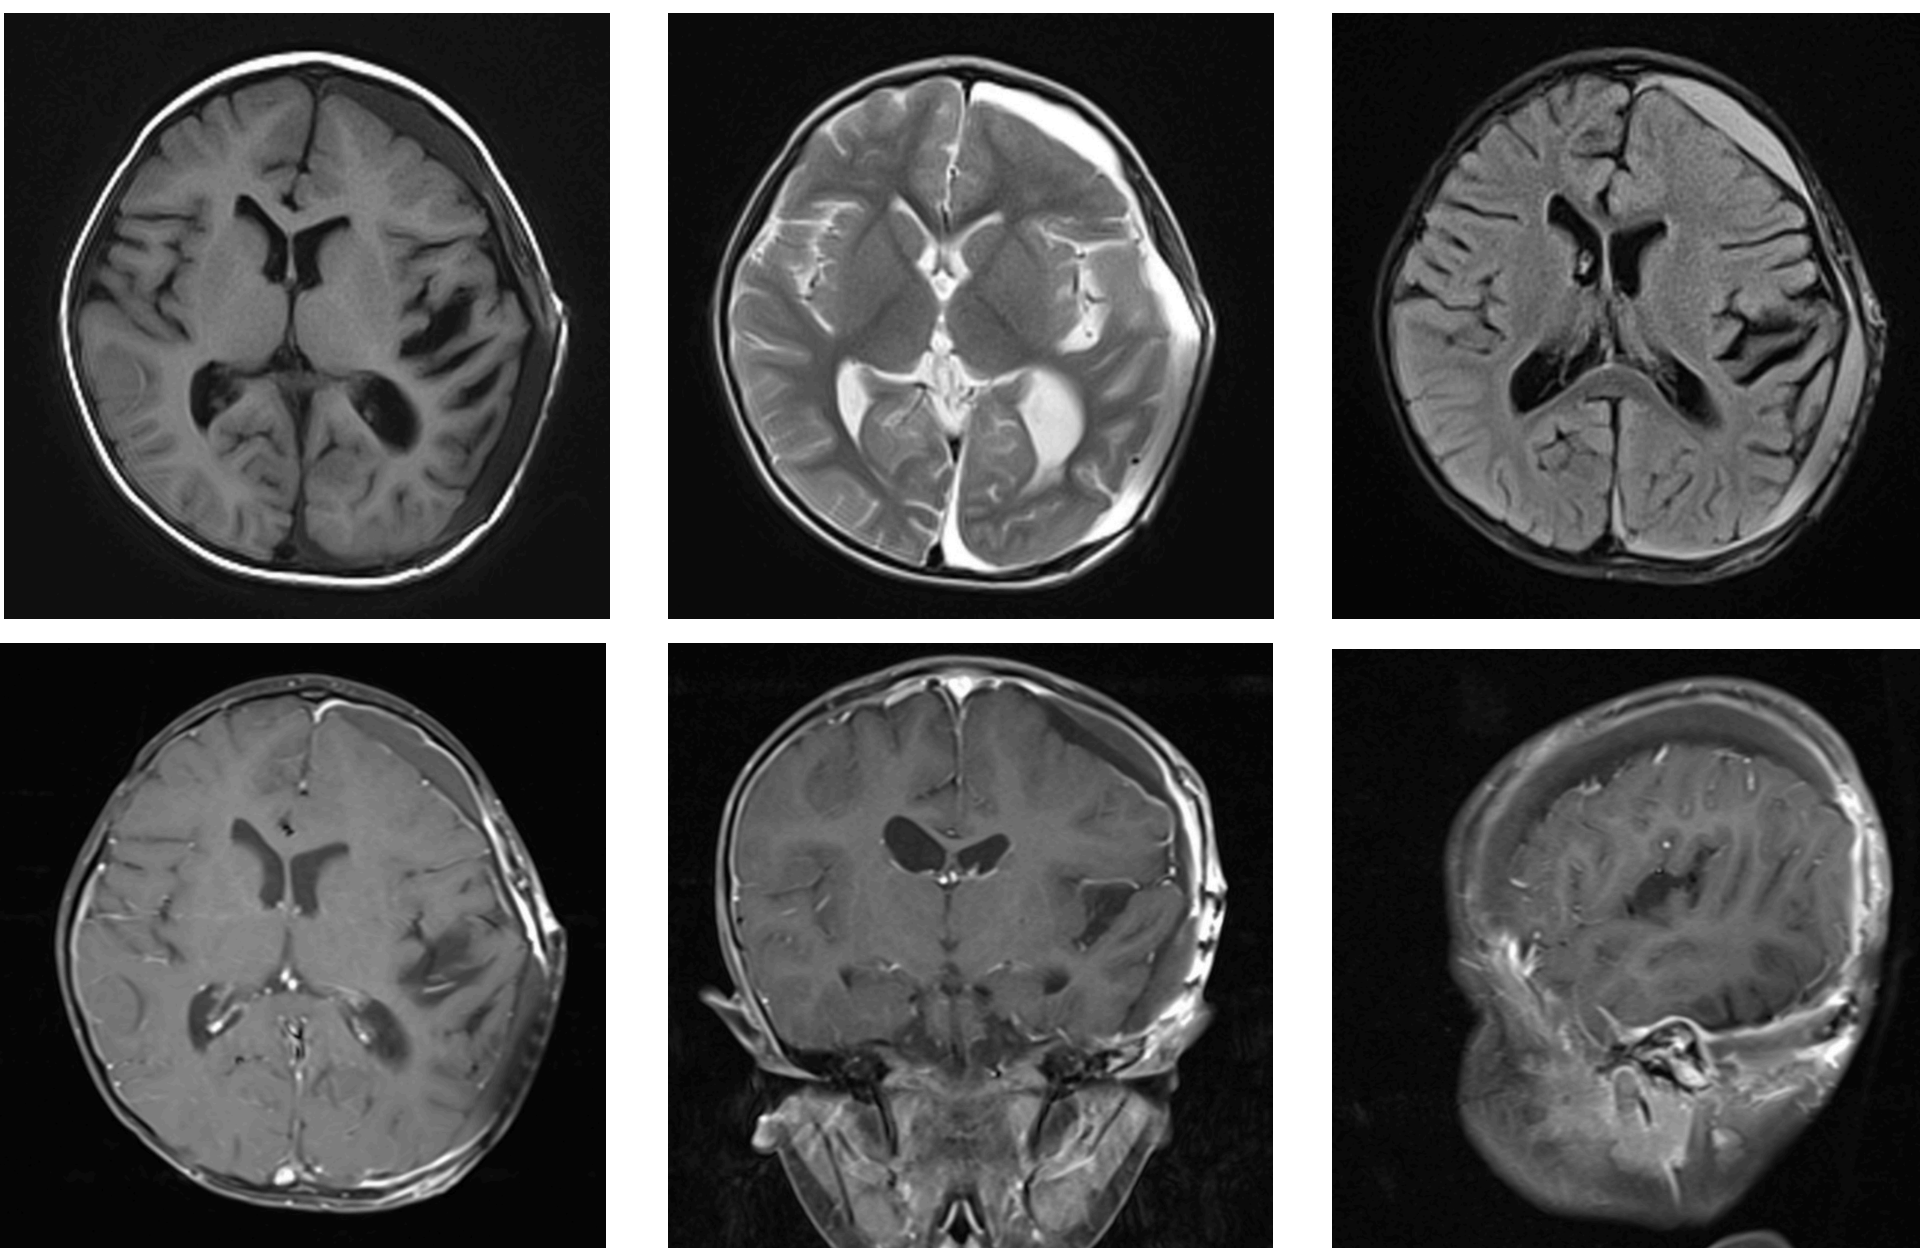

2 months, after the first operation

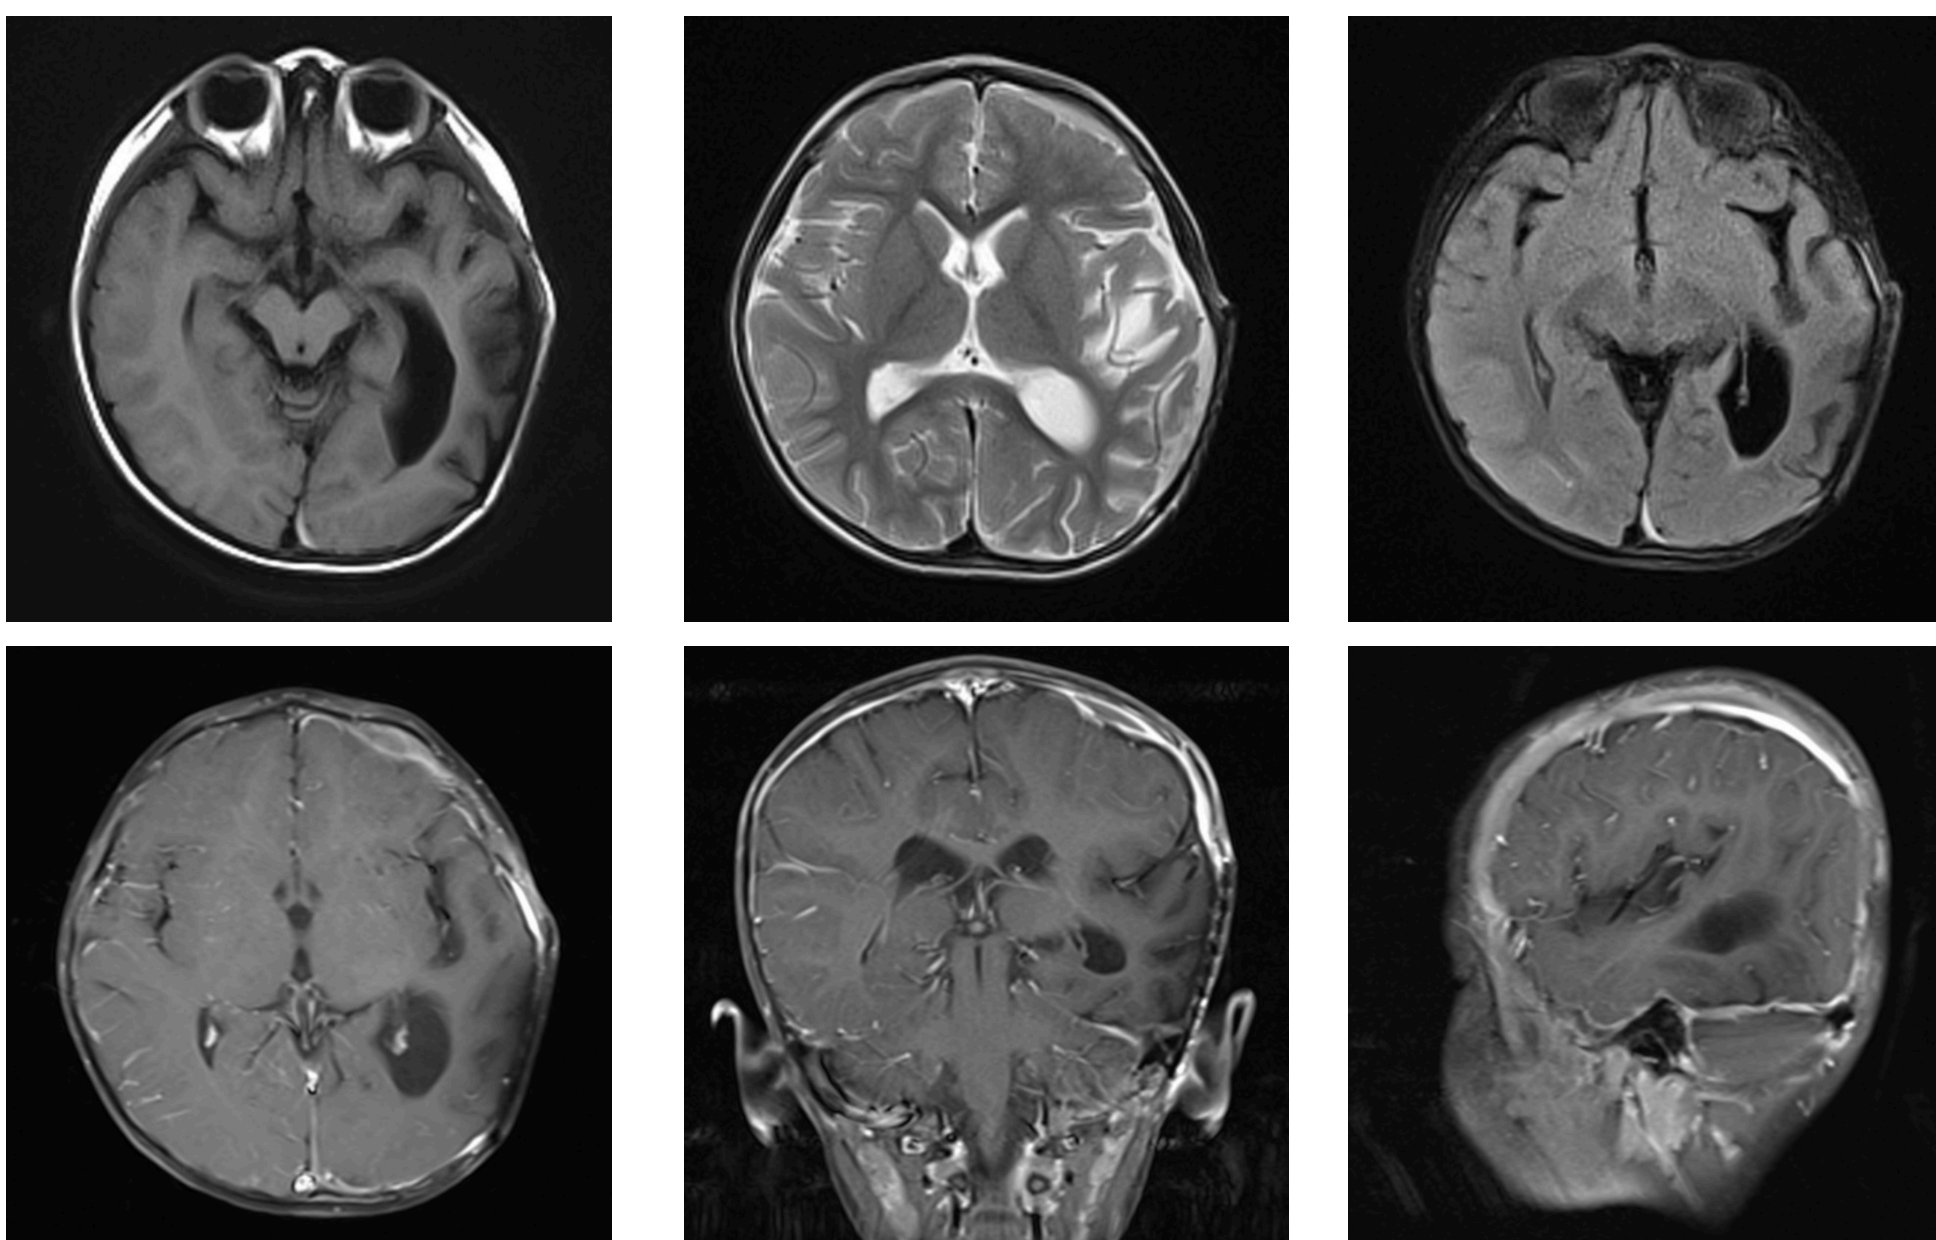



6 months, after the first operation

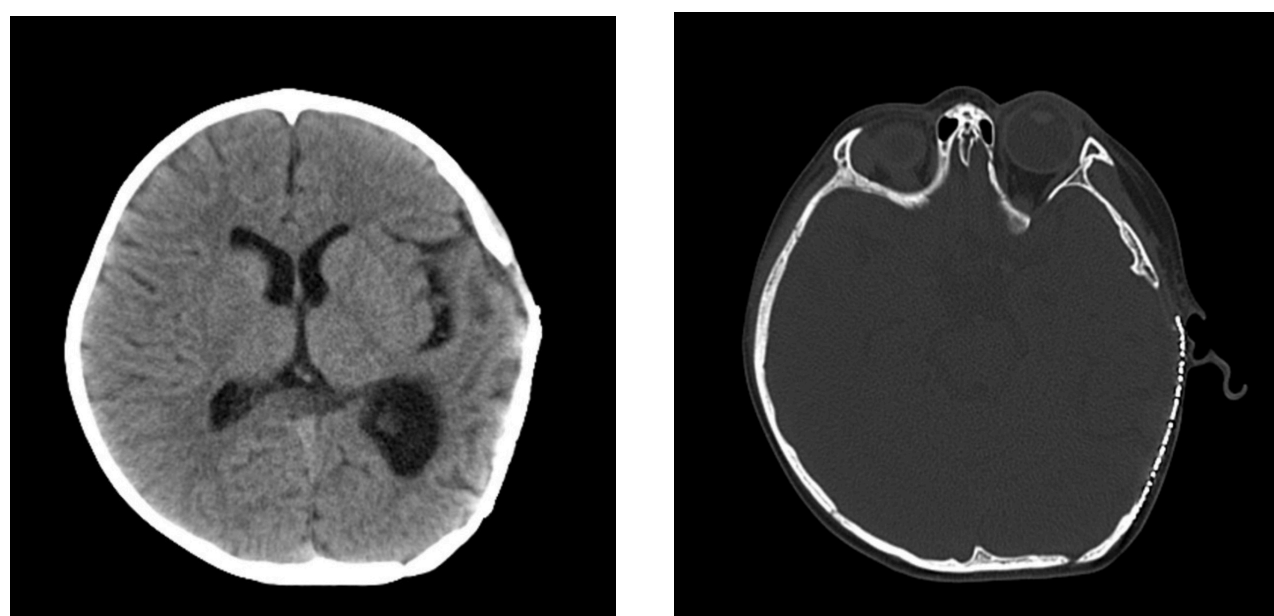

1 year, after the second operation

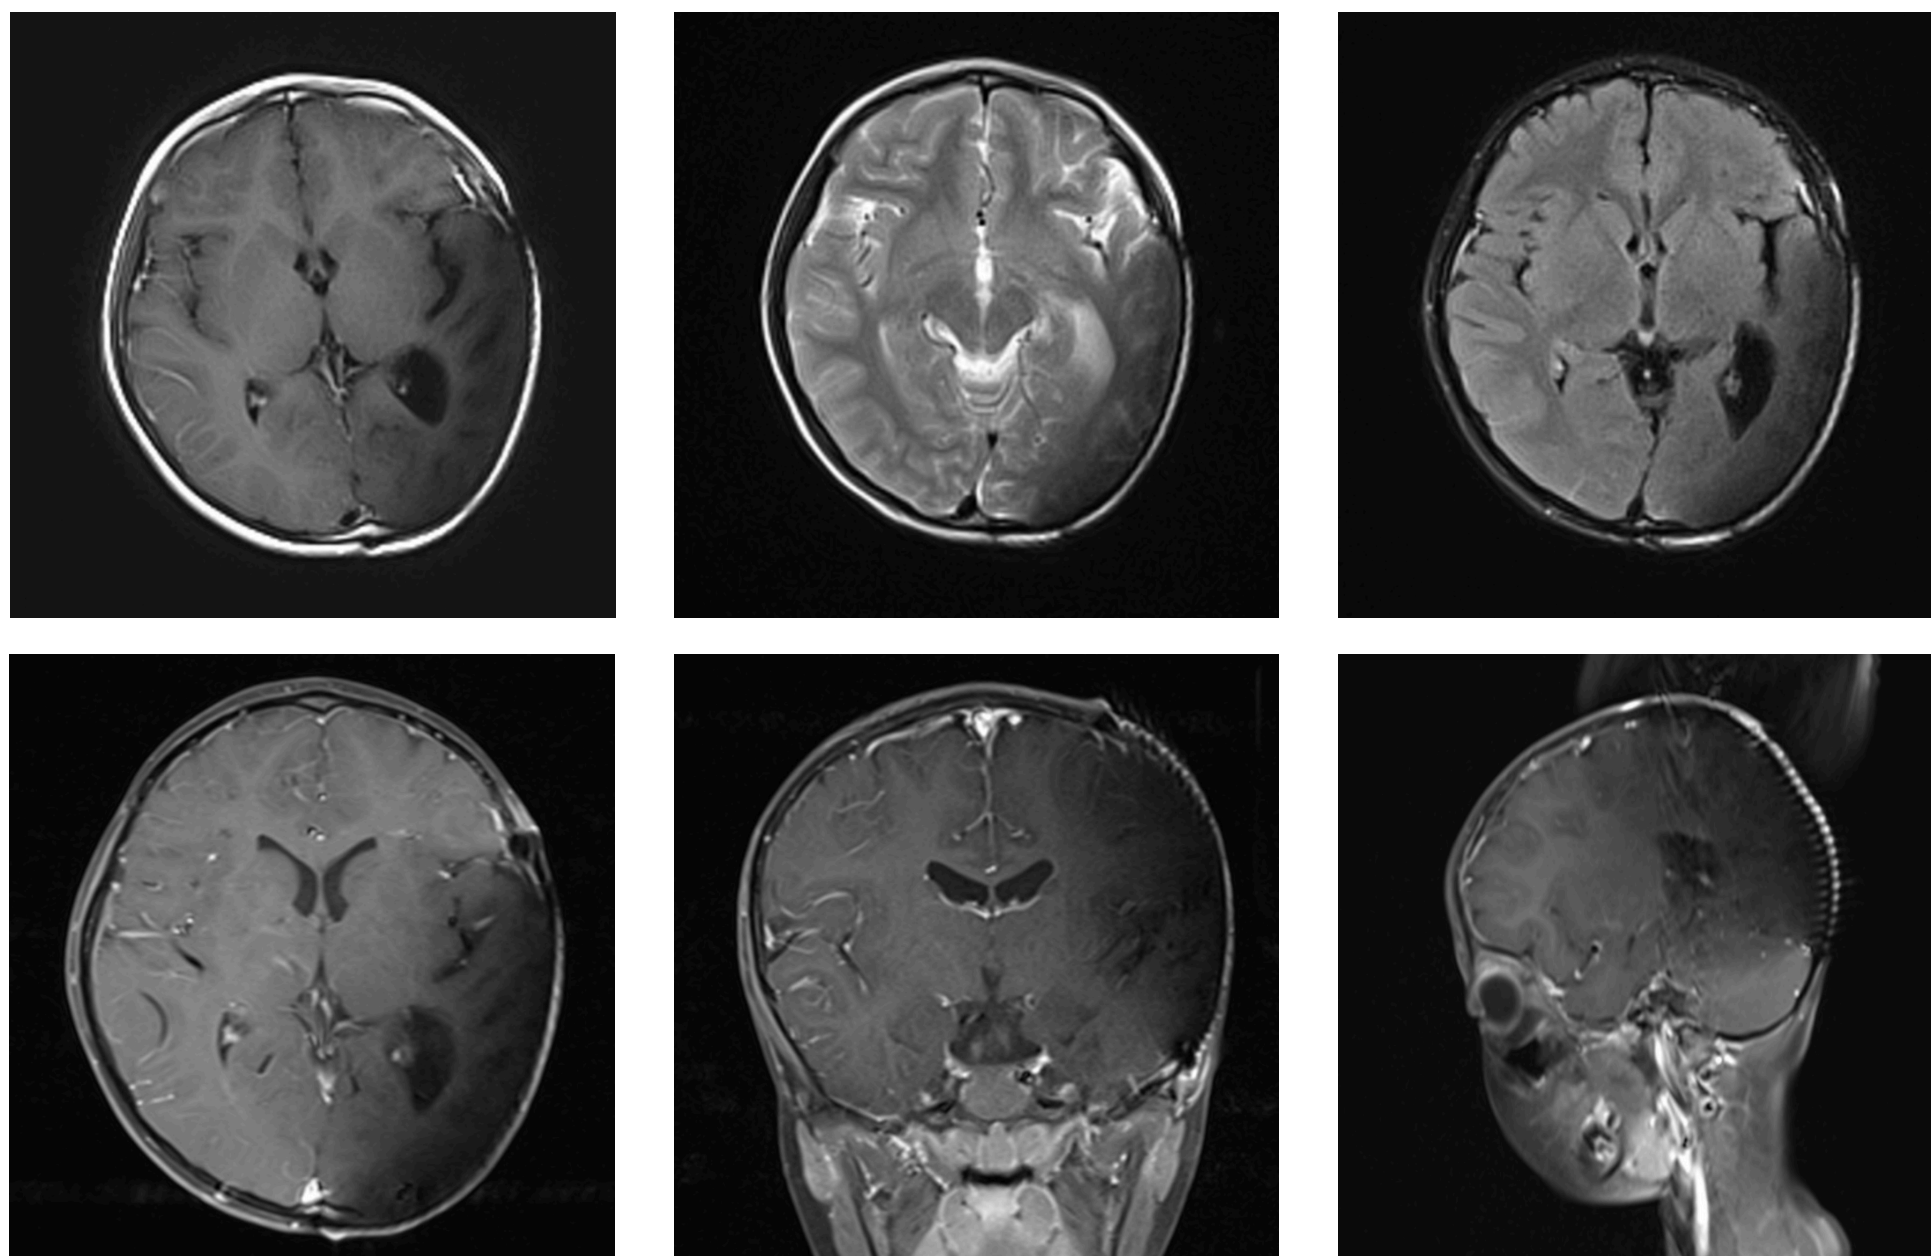

1 year, after the second operation

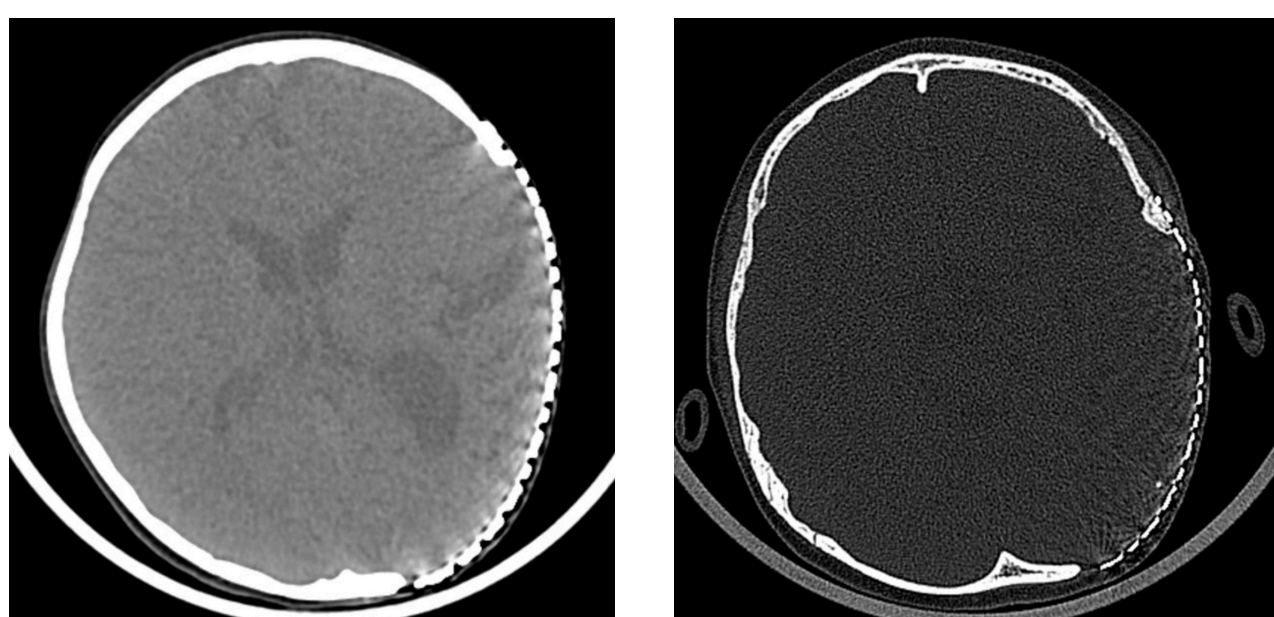

2 years, after the second operation

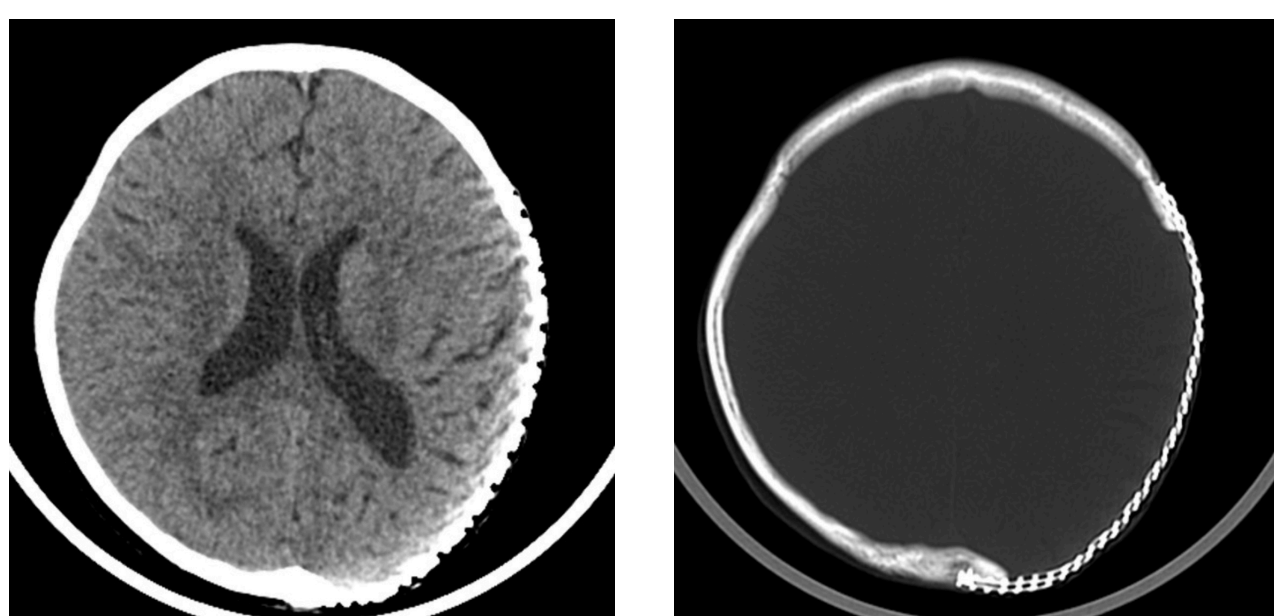

Supplement: Data_Sheet_1_v1.pdf [file Data_Sheet_1_v1.pdf]
